# Supplementary material for: Rapid coupling between gravitational forces and the transcriptome in human myelomonocytic U937 cells
Source: PubMed Central journal article supplement (PMC6125427; doi:10.1038/s41598-018-31596-y), 2018-09-05
Supplement: 41598_2018_31596_MOESM1_ESM.pdf [file 41598_2018_31596_MOESM1_ESM.pdf]

## Supplementary Information

### Rapid coupling between gravitational forces and the transcriptome in human myelomonocytic U937 cells

Cora S. Thiel <sup>a,b,#,\*</sup>, Svantje Tauber <sup>a,b,#</sup>, Swantje Christoffel <sup>a,b</sup>, Andreas Hüge <sup>c</sup>, Beatrice A. Lauber <sup>a</sup>, Jennifer Polzer <sup>a</sup>, Katrin Paulsen <sup>a</sup>, Hartwin Lier <sup>d</sup>, Frank Engelmann <sup>d,e</sup>, Burkhard Schmitz <sup>f</sup>, Andreas Schütte <sup>f</sup>, Christiane Raig <sup>a</sup>, Liliana E. Layer <sup>a</sup>, Oliver Ullrich <sup>a,b,g,\*</sup>

<sup>a</sup> Institute of Anatomy, Faculty of Medicine, University of Zurich, Winterthurerstrasse 190, 8057 Zurich, Switzerland

<sup>b</sup> Department of Machine Design, Engineering Design and Product Development, Institute of Mechanical Engineering, Otto-von-Guericke-University Magdeburg, Universitätsplatz 2, 39106 Magdeburg, Germany

<sup>c</sup> Core Facility Genomic, Medical Faculty of Muenster, University of Muenster, Albert-Schweitzer-Campus 1, D3, Domagstrasse 3, 48149 Muenster, Germany

<sup>d</sup> KEK GmbH, Kemberger Str. 5, 06905 Bad Schmiedeberg, Germany

<sup>e</sup> Ernst-Abbe-Hochschule Jena, Carl-Zeiss-Promenade 2, 07745 Jena, Germany

<sup>f</sup> Airbus DS GmbH, Airbus-Allee 1, 28199 Bremen, Germany

<sup>g</sup> Zurich Center for Integrative Human Physiology (ZIHP), University of Zurich, Winterthurerstrasse 190, 8057 Zurich, Switzerland

**Supplementary Fig. S1:** GOrilla analysis of microgravity-sensitive differentially expressed transcripts identified for the 19<sup>th</sup> DLR parabolic flight campaign.

**Supplementary Fig. S2:** GOrilla analysis of hypergravity-sensitive differentially expressed transcripts identified for the 19<sup>th</sup> DLR parabolic flight campaign.

**Supplementary Fig. S3:** GOrilla analysis of microgravity-sensitive differentially expressed transcripts identified for the TEXUS-49 suborbital ballistic rocket campaign.

**Supplementary Fig. S4:** GOrilla analysis of hypergravity-sensitive differentially expressed transcripts identified for the TEXUS-49 suborbital ballistic rocket campaign.



# Parabolic flight experiment

## hypergravity-sensitive differentially expressed transcripts

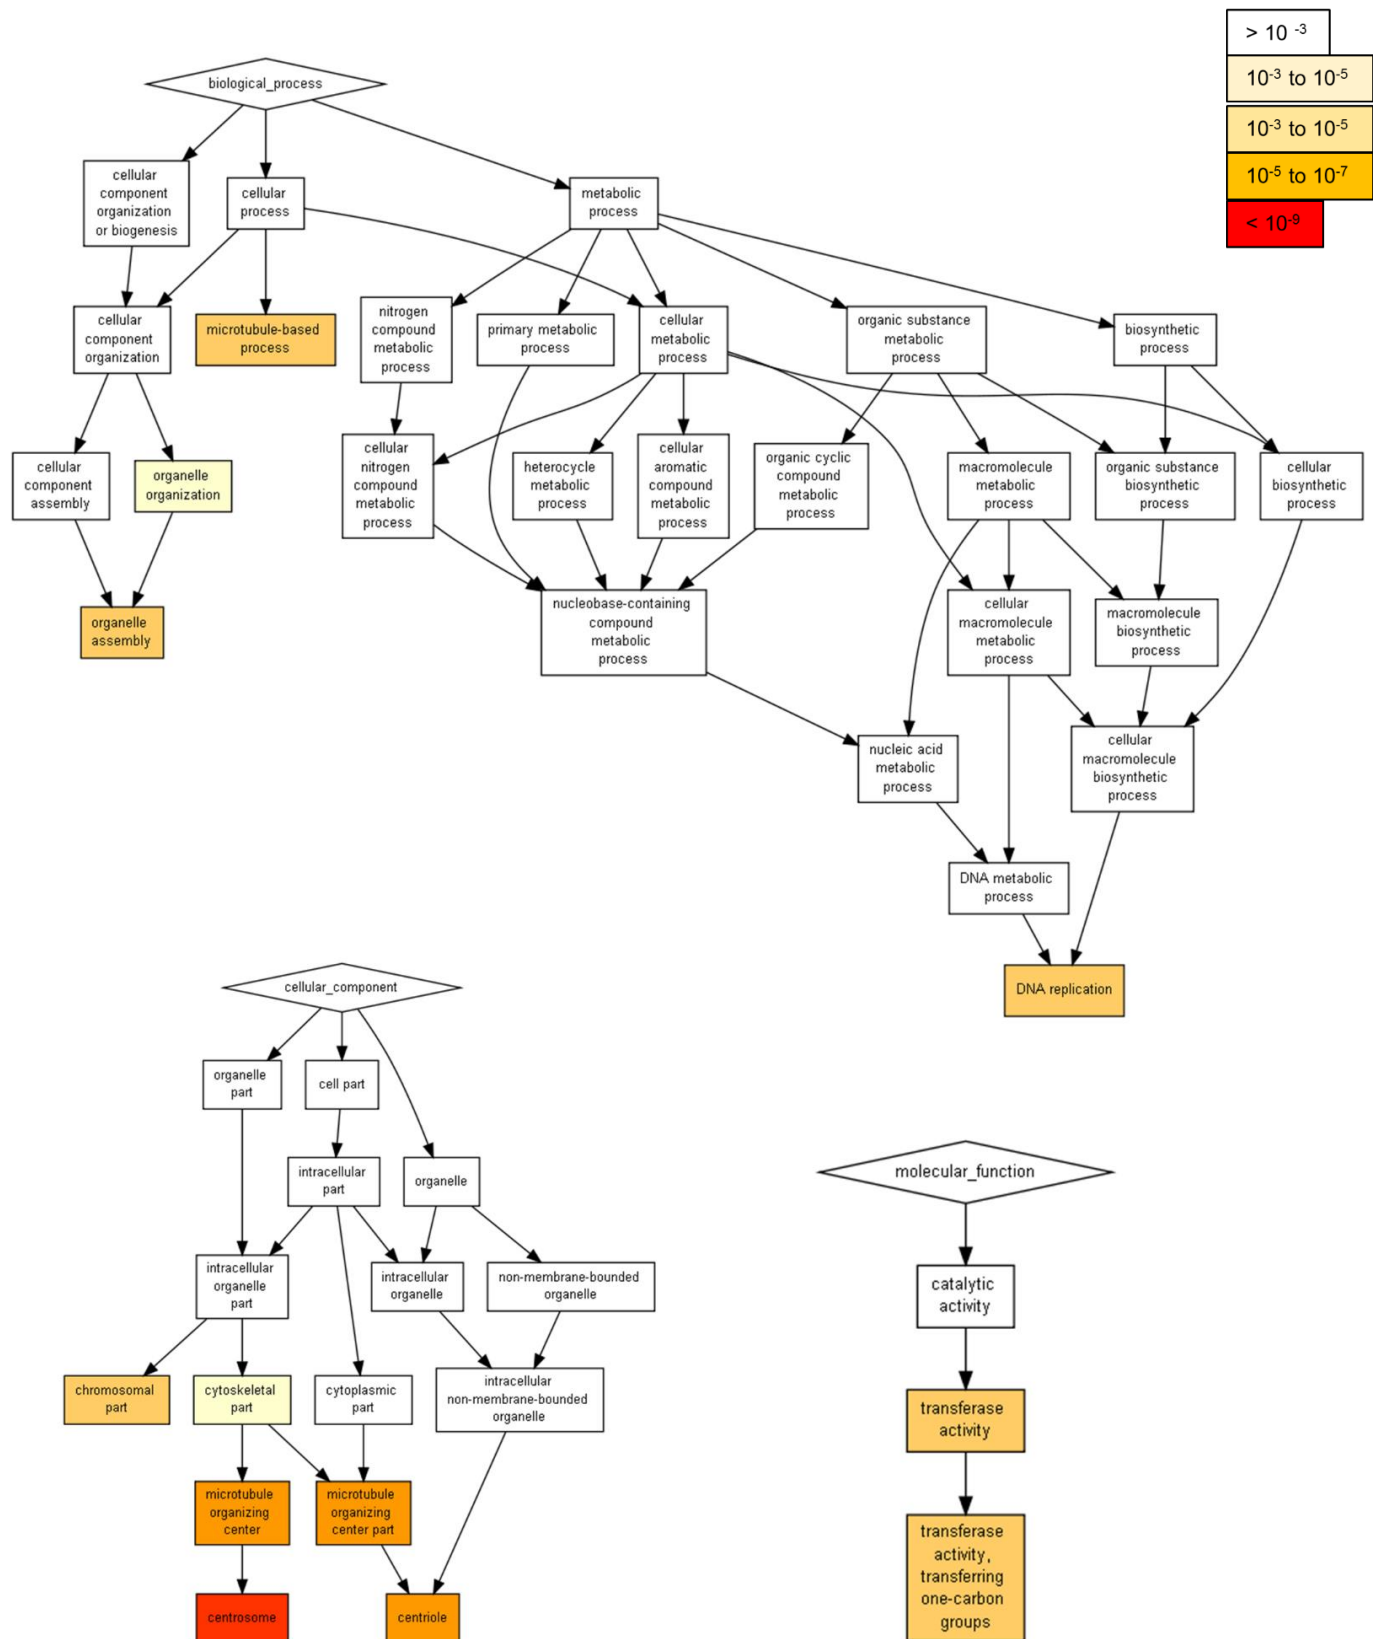

Supplementary Fig. 2



# TEXUS-49 suborbital ballistic rocket experiment

## hypergravity-sensitive differentially expressed transcripts

|                                      |
|--------------------------------------|
| > 10 <sup>-3</sup>                   |
| 10 <sup>-3</sup> to 10 <sup>-5</sup> |
| 10 <sup>-3</sup> to 10 <sup>-5</sup> |
| 10 <sup>-5</sup> to 10 <sup>-7</sup> |
| < 10 <sup>-9</sup>                   |

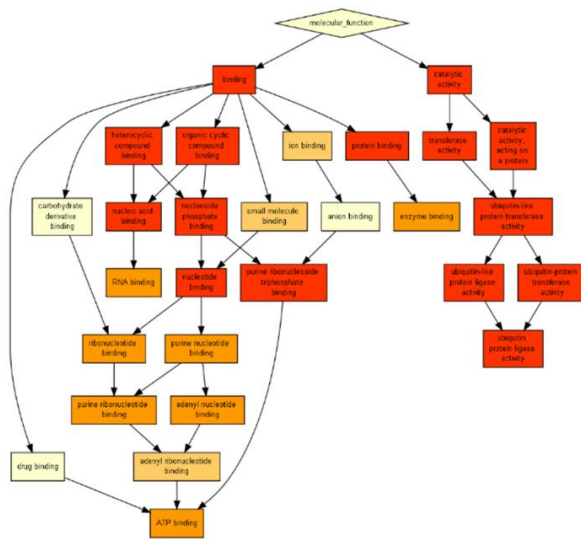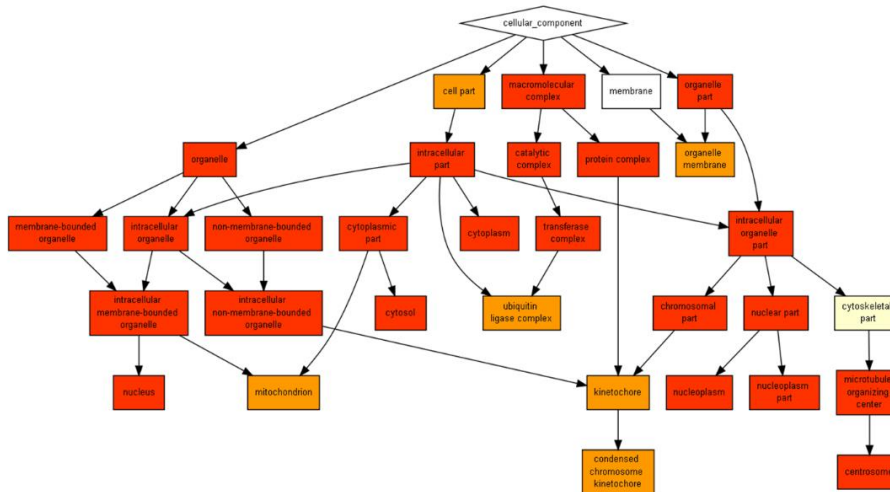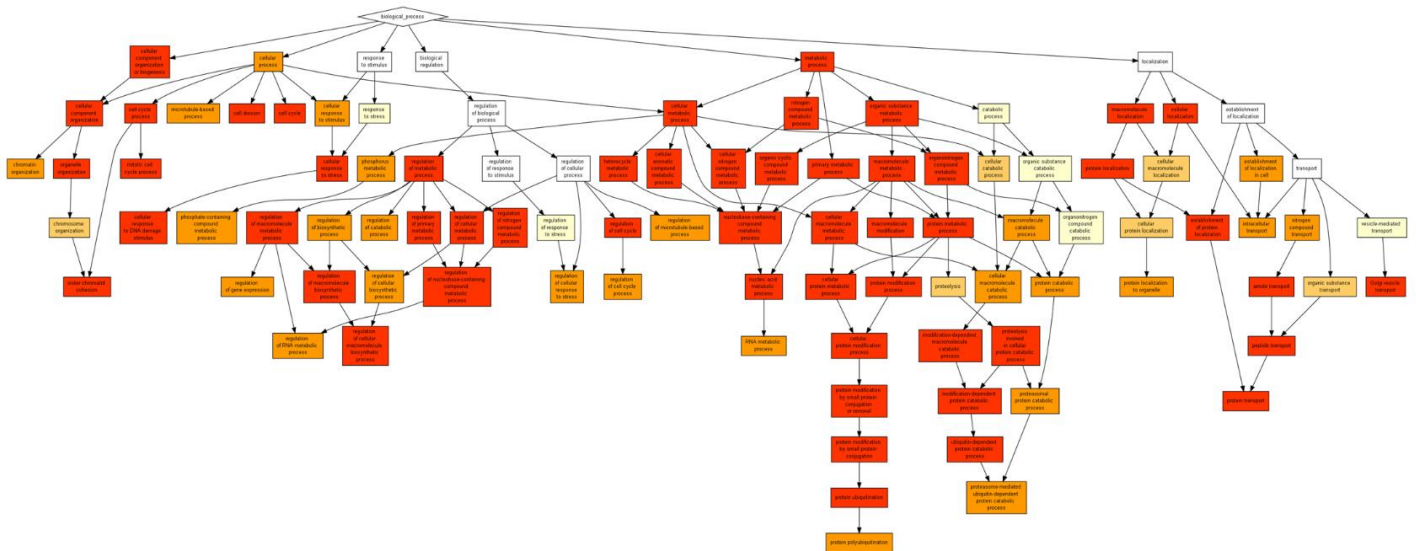

Supplementary Fig.4

**Supplementary Table S1:** Differentially regulated annotated transcripts in microgravity (alphabetically listed), sensitive to the cation channel inhibitor SKF-96365, identified in the TEXUS-49 suborbital ballistic rocket campaign. Annotated transcripts with a sensitivity to microgravity which is either enhanced or attenuated by SKF-96365 exposure are shown. Green: significantly up-regulated transcripts (p-value < 0.05, FC  $\geq$  +1.3), red: significantly down-regulated transcripts (p-value < 0.05, FC  $\leq$  -1.3). FCs are ratios between the averages of linear expression values. If the ratio is < 1, FC is calculated as the negative reciprocal of the ratio.

|                  |                                                                                               |                    | <b>fold change</b>                       |                                                   |
|------------------|-----------------------------------------------------------------------------------------------|--------------------|------------------------------------------|---------------------------------------------------|
|                  |                                                                                               |                    | <b>TEXUS-49</b>                          |                                                   |
| <b>gene name</b> | <b>full gene name</b>                                                                         | <b>probeset ID</b> | <b><math>\mu</math>g vs. BL-TX hyp-g</b> | <b><math>\mu</math>g SKF vs <math>\mu</math>g</b> |
| ACSL3            | acyl-CoA synthetase long-chain family member 3                                                | NM_004457          | -1.931                                   | 1.936                                             |
| ADAM21           | ADAM metallopeptidase domain 21                                                               | NM_003813          | 1.318                                    | -1.423                                            |
| AKR1CL2          | aldo-keto reductase family 1, member C-like 2                                                 | NM_031436          | 1.774                                    | -1.865                                            |
| AMPD1            | adenosine monophosphate deaminase 1 (isoform M)                                               | NM_000036          | 1.545                                    | -1.799                                            |
| ANAPC7           | anaphase promoting complex subunit 7                                                          | BC017316           | -1.364                                   | 1.386                                             |
| ANGPT1           | angiopoietin 1                                                                                | BC029406           | -1.436                                   | 1.816                                             |
| ANGPT2           | angiopoietin 2                                                                                | AF187858           | 1.394                                    | -1.329                                            |
| ANXA5            | annexin A5                                                                                    | NM_001154          | -1.369                                   | 1.397                                             |
| C11orf16         | chromosome 11 open reading frame 16                                                           | BC027865           | 1.769                                    | -1.903                                            |
| C14orf119        | chromosome 14 open reading frame 119                                                          | NM_017924          | 1.481                                    | -1.664                                            |
| C20orf50         | chromosome 20 open reading frame 50                                                           | XM_933095          | 1.524                                    | -1.592                                            |
| C21orf100        | chromosome 21 open reading frame 100                                                          | NM_145033          | 1.601                                    | 1.674                                             |
| C2orf33          | chromosome 2 open reading frame 33                                                            | CR625753           | -1.405                                   | 1.482                                             |
| C2orf33          | chromosome 2 open reading frame 33                                                            | NM_020194          | -1.399                                   | 1.436                                             |
| C3orf37          | chromosome 3 open reading frame 37                                                            | BC010125           | -1.369                                   | 1.478                                             |
| C6orf170         | chromosome 6 open reading frame 170                                                           | AK125385           | -1.468                                   | 1.441                                             |
| CA12             | carbonic anhydrase XII                                                                        | BC000278           | 1.713                                    | -1.894                                            |
| CALCA            | calcitonin/calcitonin-related polypeptide, alpha                                              | NM_001741          | 2.141                                    | -2.283                                            |
| CASR             | calcium-sensing receptor (hypocalciuric hypercalcemia 1, severe neonatal hyperparathyroidism) | NM_000388          | 1.970                                    | -2.107                                            |



|          |                                                                             |              |        |        |
|----------|-----------------------------------------------------------------------------|--------------|--------|--------|
| CCDC36   | coiled-coil domain containing 36                                            | NM_178173    | 2.782  | -3.593 |
| CCNL1    | cyclin L1                                                                   | AF367476     | -1.618 | 1.638  |
| COBL     | cordon-bleu homolog (mouse)                                                 | NM_015198    | 1.873  | -1.913 |
| COL14A1  | collagen, type XIV, alpha 1 (undulin)                                       | NM_021110    | -1.690 | 1.754  |
| DNAJB13  | DnaJ (Hsp40) related, subfamily B, member 13                                | NM_153614    | 1.742  | -1.825 |
| DRD2     | dopamine receptor D2                                                        | AB209832     | 1.441  | -1.350 |
| ELMO2    | engulfment and cell motility 2                                              | NM_133171    | -1.307 | 1.424  |
| EVC      | Ellis van Creveld syndrome                                                  | NM_153717    | 2.883  | -4.102 |
| FCRLM1   | Fc receptor-like and mucin-like 1                                           | AF329495     | -1.322 | 1.548  |
| FGF5     | fibroblast growth factor 5                                                  | BC074858     | -1.337 | 1.381  |
| FILIP1   | filamin A interacting protein 1                                             | NM_015687    | 1.432  | -1.492 |
| FLJ32065 | hypothetical protein FLJ32065                                               | BC073870     | -1.439 | 1.423  |
| FLJ35773 | hypothetical protein FLJ35773                                               | NM_152599    | 1.432  | 1.397  |
| FLJ39653 | hypothetical protein FLJ39653                                               | NM_152684    | 1.738  | -1.671 |
| GCNT2    | glucosaminyl (N-acetyl) transferase 2, I-branching enzyme (I blood group)   | NM_001491    | -1.399 | 1.325  |
| GLS2     | glutaminase 2 (liver, mitochondrial)                                        | NM_013267    | -1.524 | 1.578  |
| GLT8D3   | glycosyltransferase 8 domain containing 3                                   | XM_290597    | -1.500 | -1.429 |
| GOT1     | glutamic-oxaloacetic transaminase 1, soluble (aspartate aminotransferase 1) | BC000498     | -1.344 | 1.441  |
| GSG2     | germ cell associated 2 (haspin)                                             | NM_031965    | -1.428 | 1.411  |
| HCP5     | HLA complex P5                                                              | CR626077     | 1.399  | -1.749 |
| HELT     | Hey-like transcriptional repressor                                          | NM_001029887 | 1.405  | 1.455  |
| HEMGN    | hemogen                                                                     | NM_018437    | 1.338  | -1.324 |
| HSF2     | heat shock transcription factor 2                                           | BC005329     | -1.845 | 2.038  |
| IGSF4B   | immunoglobulin superfamily, member 4B                                       | BC033819     | 1.904  | -2.062 |
| IL1RAP   | interleukin 1 receptor accessory protein                                    | NM_134470    | -1.909 | 1.851  |
| IPO9     | importin 9                                                                  | AK001264     | -1.422 | 1.435  |
| KCNA2    | potassium voltage-gated channel, shaker-related subfamily, member 2         | NM_004974    | 2.993  | -4.167 |
| KCNJ11   | potassium inwardly-rectifying channel, subfamily J, member 11               | BC064497     | 1.586  | -1.540 |
| KIAA0672 | KIAA0672 gene product                                                       | AK023797     | 1.454  | -1.458 |



|           |                                                                                             |           |        |        |
|-----------|---------------------------------------------------------------------------------------------|-----------|--------|--------|
| LAMA4     | laminin, alpha 4                                                                            | BC066552  | 1.394  | -1.318 |
| LCE5A     | late cornified envelope 5A                                                                  | NM_178438 | 1.805  | -1.949 |
| LNX1      | ligand of numb-protein X 1                                                                  | BC022983  | 1.391  | -1.669 |
| LOC129881 | hypothetical LOC129881                                                                      | XM_926895 | 1.487  | 1.678  |
| LOC136288 | hypothetical protein LOC136288                                                              | XM_059832 | 1.406  | -1.375 |
| LOC284395 | hypothetical protein LOC284395                                                              | XM_378787 | 1.306  | -1.384 |
| LOC392269 | similar to Transcription factor SOX-2                                                       | XM_928112 | 2.567  | -2.651 |
| LOC441818 | similar to WW domain binding protein 11                                                     | XM_929771 | -1.403 | 1.423  |
| LOC642578 | similar to acyl-CoA synthetase medium-chain family member 1                                 | XM_926063 | 1.322  | 1.803  |
| LOC642867 | hypothetical protein LOC642867                                                              | XM_931130 | 1.355  | -1.521 |
| LOC643824 | similar to cauxin                                                                           | XM_933277 | 1.344  | 1.376  |
| LOC644277 | hypothetical protein LOC644277                                                              | XM_932098 | 2.157  | -2.255 |
| LOC644280 | hypothetical protein LOC644280                                                              | XM_497769 | 1.379  | 1.379  |
| LOC644320 | hypothetical protein LOC644320                                                              | XM_934362 | 1.338  | 1.350  |
| LOC644541 | hypothetical protein LOC644541                                                              | XM_932234 | 1.308  | 1.539  |
| LOC644629 | hypothetical protein LOC644629                                                              | XM_932271 | 1.407  | -1.809 |
| LOC645158 | hypothetical protein LOC645158                                                              | XM_932692 | -1.499 | 1.555  |
| LOC645343 | hypothetical protein LOC645343                                                              | XM_928377 | 1.442  | 1.390  |
| LOC645491 | similar to phosphoglucomutase 5                                                             | XM_928516 | 1.628  | -1.760 |
| LOC645903 | hypothetical protein LOC645903                                                              | XM_933255 | 1.567  | -1.620 |
| LOC646055 | hypothetical protein LOC646055                                                              | XM_933369 | 2.002  | -1.834 |
| LOC646522 | hypothetical protein LOC646522                                                              | XM_933676 | 2.000  | -2.370 |
| LOC653522 | similar to hypothetical protein FLJ22679                                                    | XM_927884 | -1.415 | 1.539  |
| LOC653555 | similar to Charged multivesicular body protein 4b (Chromatin modifying protein 4b) (CHMP4b) | XM_930357 | -1.357 | 1.389  |
| LRRC28    | leucine rich repeat containing 28                                                           | AY358082  | -1.328 | 1.386  |
| LYSMD4    | LysM, putative peptidoglycan-binding, domain containing 4                                   | BX640928  | 1.397  | -2.045 |
| MCM3AP    | MCM3 minichromosome maintenance deficient 3 ( <i>S. cerevisiae</i> ) associated protein     | NM_003906 | -1.490 | 1.563  |
| MDM1      | Mdm4, transformed 3T3 cell double minute 1, p53 binding protein (mouse)                     | NM_020128 | -1.500 | 1.695  |

|          |                                                                                    |              |        |        |
|----------|------------------------------------------------------------------------------------|--------------|--------|--------|
| MGST2    | microsomal glutathione S-transferase 2                                             | BC025416     | -1.475 | 1.352  |
| MS4A6E   | membrane-spanning 4-domains, subfamily A, member 6E                                | BC069322     | -1.393 | 1.373  |
| MYRIP    | myosin VIIA and Rab interacting protein                                            | BC109312     | -1.517 | 1.615  |
| NPR3     | natriuretic peptide receptor C/guanylate cyclase C (atriuretic peptide receptor C) | NM_000908    | 1.442  | -1.417 |
| PDCD1LG2 | programmed cell death 1 ligand 2                                                   | BC074766     | 1.409  | -1.411 |
| PDCD7    | programmed cell death 7                                                            | NM_005707    | -1.394 | 1.475  |
| PEG10    | paternally expressed 10                                                            | BC050659     | 1.332  | -1.370 |
| PFDN6    | prefoldin subunit 6                                                                | NM_014260    | -1.399 | 1.338  |
| PGEA1    | PKD2 interactor, golgi and endoplasmic reticulum associated 1                      | NM_015373    | -1.470 | 1.516  |
| POU2F1   | POU domain, class 2, transcription factor 1                                        | BC001664     | -1.354 | 1.460  |
| PPP6C    | protein phosphatase 6, catalytic subunit                                           | NM_002721    | -1.477 | 1.472  |
| PRH2     | proline-rich protein HaeIII subfamily 2                                            | NM_005042    | -1.333 | 1.308  |
| RACGAP1  | Rac GTPase activating protein 1                                                    | BC032754     | -1.453 | 1.362  |
| RASSF5   | Ras association (RalGDS/AF-6) domain family 5                                      | NM_031437    | -1.387 | 1.327  |
| RNF185   | ring finger protein 185                                                            | NM_152267    | -1.372 | 1.400  |
| RTP2     | receptor transporter protein 2                                                     | NM_001004312 | 1.352  | -1.709 |
| SEMG1    | semenogelin I                                                                      | NM_198139    | 1.576  | -1.512 |
| SETD4    | SET domain containing 4                                                            | NM_001007259 | -1.411 | 1.423  |
| SFRS15   | splicing factor, arginine/serine-rich 15                                           | AL834304     | -1.425 | 1.512  |
| SLC4A9   | solute carrier family 4, sodium bicarbonate cotransporter, member 9                | AF332961     | 1.405  | 1.438  |
| SLC6A11  | solute carrier family 6 (neurotransmitter transporter, GABA), member 11            | NM_014229    | 1.796  | -1.893 |
| TCEB3    | transcription elongation factor B (SIII), polypeptide 3 (110 kDa, elongin A)       | NM_003198    | -1.325 | 1.416  |
| TDP1     | tyrosyl-DNA phosphodiesterase 1                                                    | BC015474     | -1.489 | 1.508  |
| TGFBI    | transforming growth factor, beta-induced, 68 kDa                                   | NM_000358    | -1.374 | 1.383  |
| TPD52L2  | tumor protein D52-like 2                                                           | NM_003288    | -1.458 | 1.466  |
| TPM1     | tropomyosin 1 (alpha)                                                              | AY640414     | -1.431 | 1.464  |
| TRH      | thyrotropin-releasing hormone                                                      | BC074888     | 1.592  | -1.539 |
| TRPM8    | transient receptor potential cation channel, subfamily M, member 8                 | NM_024080    | -1.472 | 1.364  |

|        |                                         |              |        |        |
|--------|-----------------------------------------|--------------|--------|--------|
| VWCE   | von Willebrand factor C and EGF domains | NM_152718    | 2.357  | -2.557 |
| WIT1   | Wilms tumor upstream neighbor 1         | NM_015855    | 1.436  | 1.470  |
| WWOX   | WW domain containing oxidoreductase     | BC003184     | 1.323  | -1.804 |
| ZNF16  | zinc finger protein 16 (KOX 9)          | NM_001029976 | -1.301 | 1.311  |
| ZNF226 | zinc finger protein 226                 | NM_001032375 | -1.548 | 1.857  |
| ZNF275 | zinc finger protein 275                 | XM_931920    | -1.433 | 1.460  |
| ZNF275 | zinc finger protein 275                 | XM_931925    | -1.431 | 1.501  |
| ZNF283 | zinc finger protein 283                 | AK098175     | -1.329 | 1.541  |

**Supplementary Table S2:** Regulation of transcripts involved in apoptotic/necroptotic pathways in response to altered gravitational conditions in the 19<sup>th</sup> DLR parabolic flight campaign. Hypergravity-sensitivity: Differentially expressed in BL-PFC hyp-g vs 1g IF, but not differentially expressed in 1g IF vs H/W 1g GC. Microgravity sensitivity: Differentially expressed in  $\mu$ g vs BL-PFC hyp-g, but not differentially expressed in 1g IF vs H/W 1g GC or in the same direction in BL-PFC hyp-g vs 1g IF. Differential expression is defined as t-test p-value < 0.05; fold change  $\leq$  -1.3 or  $\geq$  +1.3.

|                              | hypergravity sensitivity | microgravity sensitivity |
|------------------------------|--------------------------|--------------------------|
| not differentially expressed | <b>444 (80%)</b>         | <b>549 (99%)</b>         |
| up-regulated                 | 45 (8%)                  | 1 (<1%)                  |
| down-regulated               | 64 (12%)                 | 3 (<1%)                  |
| <b>total number</b>          | <b>553</b>               | <b>553</b>               |

**Supplementary Table S3:** Regulation of selected key molecules involved in apoptotic/necroptotic pathways in response to altered gravitational conditions in the 19<sup>th</sup> DLR parabolic flight campaign. All probeset-IDs that correspond to a gene are listed. Bright blue: not significantly up-regulated transcripts (p-value > 0.05, FC ≥ +1.3). Yellow: not differentially expressed (FC ≥ -1.3 and ≤ +1.3, p-value independent). Orange: not significantly down-regulated transcripts (p-value > 0.05, FC ≤ -1.3). Red: significantly down-regulated transcripts (p-value < 0.05, FC ≤ -1.3). FCs are ratios between the averages of linear expression values. If the ratio is <1, FC is calculated as the negative reciprocal of the ratio.

| gene      | probeset-ID | hypergravity-sensitive transcripts<br>comparison BL-PFC hyp-g vs 1g IF |             |          | microgravity-sensitive transcripts<br>comparison μg vs BL-PFC hyp-g |             |          |
|-----------|-------------|------------------------------------------------------------------------|-------------|----------|---------------------------------------------------------------------|-------------|----------|
|           |             | t-test p-value                                                         | fold change | tendency | t-test p-value                                                      | fold change | tendency |
| Caspase 3 | NM_004346   | 0.182                                                                  | -1.30       | ↓        | 0.624                                                               | 1.14        | ↔        |
| Caspase 7 | NM_001227   | 0.189                                                                  | -1.25       | ↔        | 0.427                                                               | 1.20        | ↔        |
| Caspase 8 | AF422925    | 0.064                                                                  | -1.52       | ↓        | 0.495                                                               | 1.24        | ↔        |
|           | BC068050    | 0.042                                                                  | -1.86       | ↓        | 0.364                                                               | 1.44        | ↑        |
|           | NM_033358   | 0.007                                                                  | -1.96       | ↓        | 0.199                                                               | 1.50        | ↑        |
|           | NM_001228   | 0.096                                                                  | -1.63       | ↓        | 0.610                                                               | 1.23        | ↔        |
| Rip1      | NM_003804   | 0.575                                                                  | -1.13       | ↔        | 0.645                                                               | 1.17        | ↔        |
| Rip3      | AY494982    | 0.609                                                                  | -1.11       | ↔        | 0.873                                                               | -1.05       | ↔        |
|           | AY494983    | 0.393                                                                  | -1.11       | ↔        | 0.846                                                               | 1.03        | ↔        |
|           | BC041668    | 0.218                                                                  | 1.22        | ↔        | 0.376                                                               | -1.16       | ↔        |
|           | BC062584    | 0.462                                                                  | -1.15       | ↔        | 0.634                                                               | 1.14        | ↔        |
|           | NM_006871   | 0.710                                                                  | -1.06       | ↔        | 0.916                                                               | -1.03       | ↔        |
| FADD      | BC000334    | 0.050                                                                  | -1.40       | ↓        | 0.317                                                               | 1.26        | ↔        |
|           | NM_003824   | 0.118                                                                  | -1.28       | ↔        | 0.485                                                               | 1.16        | ↔        |

**Supplementary Table S4:** Regulation of transcripts involved in apoptotic/necroptotic pathways in response to altered gravitational conditions in the TEXUS-49 suborbital ballistic rocket campaign. Hypergravity sensitivity: Comparison BL-TX hyp-g vs H/W 1g GC. Microgravity sensitivity: Comparison  $\mu$ g vs BL-PFC hyp-g without transcripts that are differentially expressed in the same direction in BL-TX hyp-g vs H/W 1g GC. Differential expression is defined as t-test p-value < 0.05; fold change  $\leq -1.3$  or  $\geq +1.3$ .

|                              | <b>hypergravity sensitivity</b> | <b>microgravity sensitivity</b> |
|------------------------------|---------------------------------|---------------------------------|
| not differentially expressed | <b>390 (71%)</b>                | <b>484 (88%)</b>                |
| up-regulated                 | 140 (25%)                       | 7 (1%)                          |
| down-regulated               | 23 (4%)                         | 62 (11%)                        |
| <b>total number</b>          | <b>553</b>                      | <b>553</b>                      |

**Supplementary Table S5:** Regulation of selected key molecules involved in apoptotic/necroptotic pathways in response to altered gravitational conditions in the TEXUS-49 suborbital ballistic rocket campaign. All probeset-IDs that correspond to a gene are listed. Dark blue: significantly up-regulated transcripts (p-value < 0.05, FC  $\geq$  +1.3). Bright blue: not significantly up-regulated transcripts (p-value > 0.05, FC  $\geq$  +1.3). Yellow: not differentially expressed transcripts (FC  $\geq$  -1.3 and  $\leq$  +1.3, p-value independent). Orange: not significantly down-regulated transcripts (p-value > 0.05, FC  $\leq$  -1.3). Red: significantly down-regulated transcripts (p-value < 0.05, FC  $\leq$  -1.3). FCs are ratios between the averages of linear expression values. If the ratio is <1, FC is calculated as the negative reciprocal of the ratio.

| gene      | probeset-ID | hypergravity-sensitive transcripts<br>comparison BL-TX hyp-g vs H/W 1g GC |             |          | microgravity-sensitive transcripts<br>comparison $\mu$ g vs BL-TX hyp-g |             |          |
|-----------|-------------|---------------------------------------------------------------------------|-------------|----------|-------------------------------------------------------------------------|-------------|----------|
|           |             | t-test p-value                                                            | fold change | tendency | t-test p-value                                                          | fold change | tendency |
| Caspase 3 | NM_004346   | 0.001                                                                     | 2.33        | ↑        | 0.042                                                                   | -2.12       | ↓        |
| Caspase 7 | NM_001227   | 0.004                                                                     | 1.81        | ↑        | 0.064                                                                   | -1.62       | ↓        |
| Caspase 8 | AF422925    | 0.056                                                                     | 1.59        | ↑        | 0.041                                                                   | -1.91       | ↓        |
|           | BC068050    | 0.140                                                                     | 1.54        | ↑        | 0.054                                                                   | -2.00       | ↓        |
|           | NM_033358   | 0.104                                                                     | 1.51        | ↑        | 0.061                                                                   | -1.88       | ↓        |
|           | NM_001228   | 0.046                                                                     | 1.74        | ↑        | 0.035                                                                   | -2.06       | ↓        |
| Rip1      | NM_003804   | 0.124                                                                     | 1.45        | ↑        | 0.129                                                                   | -1.59       | ↓        |
| Rip3      | AY494982    | 0.862                                                                     | -1.05       | ↔        | 0.389                                                                   | -1.24       | ↔        |
|           | AY494983    | 0.633                                                                     | -1.17       | ↔        | 0.569                                                                   | -1.12       | ↔        |
|           | BC041668    | 0.084                                                                     | -2.02       | ↓        | 0.053                                                                   | 2.25        | ↑        |
|           | BC062584    | 0.969                                                                     | -1.01       | ↔        | 0.253                                                                   | -1.30       | ↓        |
|           | NM_006871   | 0.557                                                                     | 1.12        | ↔        | 0.131                                                                   | -1.27       | ↔        |
| FADD      | BC000334    | 0.013                                                                     | -1.86       | ↓        | 0.224                                                                   | -1.43       | ↓        |
|           | NM_003824   | 0.006                                                                     | -1.87       | ↓        | 0.236                                                                   | -1.38       | ↓        |



*No strong effects on apoptosis/necroptosis-associated pathways in altered gravity*

In order to investigate proposed effects of altered gravity on apoptosis<sup>60,61</sup>, we screened our data sets for genes involved in apoptosis and necroptosis and identified 553 genes from KEGG pathways (Apoptosis - Homo sapiens PATHWAY: hsa04210; Necroptosis - Homo sapiens PATHWAY: hsa04217) and the review from Elmore<sup>62</sup>. 80% of transcripts involved in apoptotic and necroptotic pathways were unaltered in the hypergravity phase of the parabolic flight and 99% in the microgravity phase (Supplementary Table S2). Among the apoptosis/necroptosis-related hypergravity-sensitive transcripts, we identified 8% being up and 12% being down-regulated, whereas less than 1% of all apoptosis/necroptosis-related microgravity-sensitive transcripts was differentially regulated (Supplementary Table S2). In the suborbital ballistic rocket experiment, 71% of apoptosis/necroptosis-related transcripts were unaltered in the hypergravity phase and 88% in the microgravity phase (Supplementary Table S4). Among the hypergravity-sensitive transcripts, 25% were up regulated and 4% were down-regulated, while among the microgravity-sensitive transcripts, 1% was up-regulated and 11% were down-regulated (Supplementary Table S4). Since many genes listed in the KEGG pathways only play a secondary role, we directly analyzed a selection of key molecules of apoptosis and necroptosis: Caspase 3, caspase 7, caspase 8, rip1, rip3, and FADD (Supplementary Tables S3 and S4) and found that 20 s of hypergravity or microgravity altered the transcripts of these selected apoptosis/necroptosis relevant genes only slightly. In 20 s of mild hypergravity (1.8g), caspase 8 transcripts were decreased (Supplementary Table S3) indicating an anti-apoptotic effect, but increased after 75 s of stronger hypergravity (up to 13.5g) arguing for a pro-apoptotic properties (Supplementary Table S5). After 20 s of microgravity, two caspase 8 transcripts were slightly up-regulated (Supplementary Table 3), but down-regulated after 300 s of microgravity (Supplementary Table S5). 75 s of hypergravity resulted in a slight up-regulation (up to 2.33-fold) of all analyzed caspases, whereas the necroptosis specific genes remained mostly unaltered or were down-regulated (Supplementary Table S5). This up-regulation was completely reversed in the 300 s of the following microgravity phase. All investigated transcripts representing caspase 3, 7, and 8 were down-regulated in microgravity (comparison  $\mu$ g versus BL-TX hyp-g, Supplementary Table S5) and necroptosis genes were either unaltered or further down-regulated. Only rip3 that was down-regulated during the hypergravity phase was again up-regulated in microgravity (Supplementary Table S5).
